# Supplementary material
Source: Springer Nature journal article supplement (https://www.springermedizin.de/resource/supplementary/12933_2011_442_MOESM1_ESM.pdf/9538148)

no medication

miglitol

miglitol and sitagliptin

Case 1

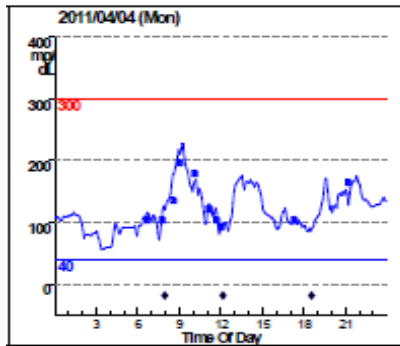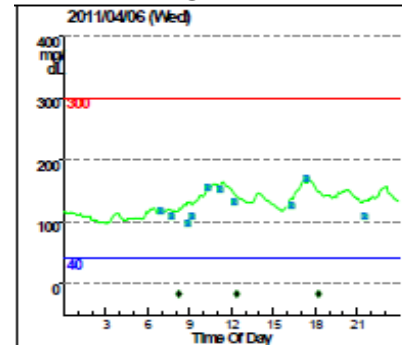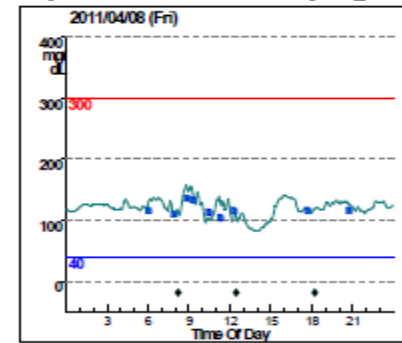

Case 2

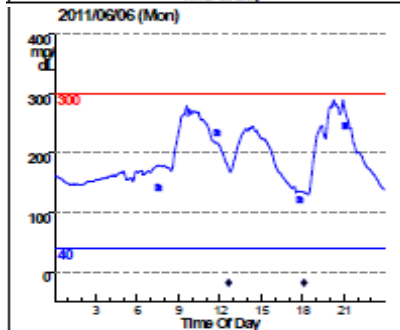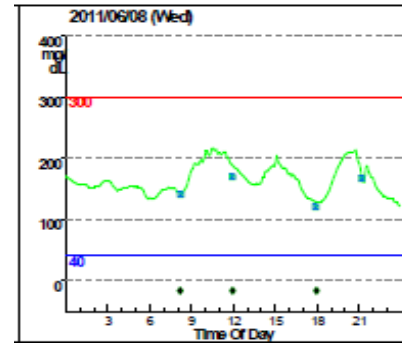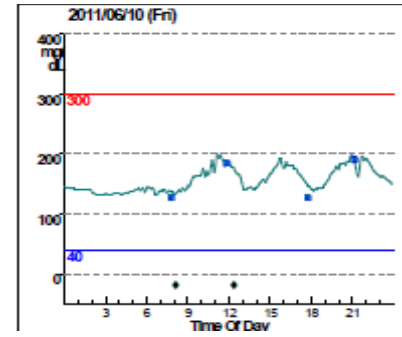

Case 3

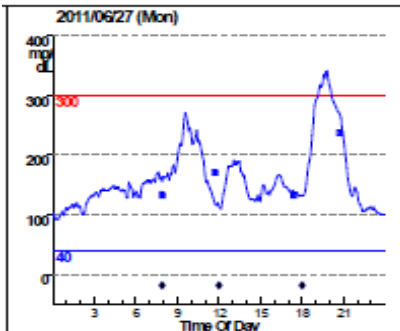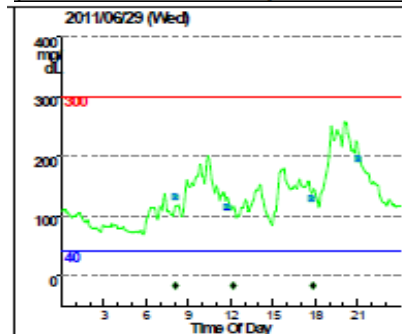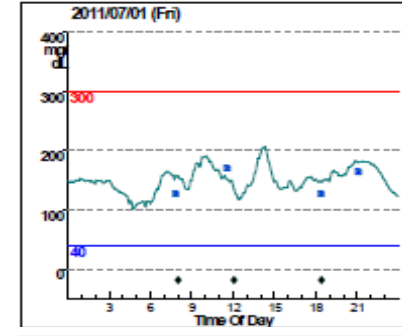

Control

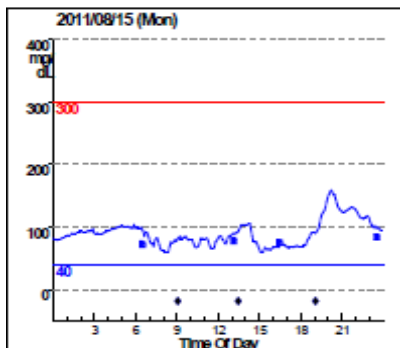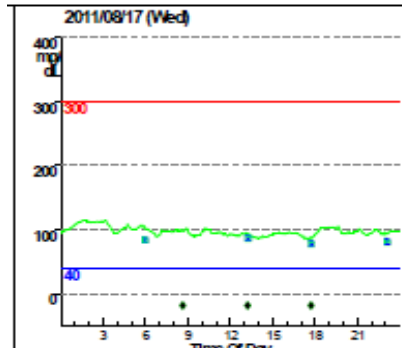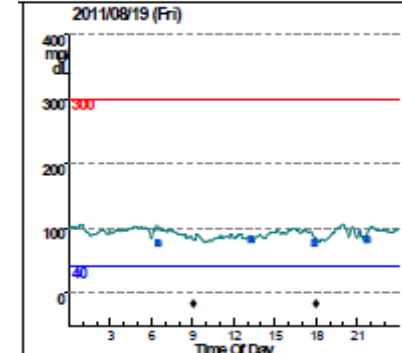

Supplement: MOESM1 [file 9538148]
